# Supplementary material for: (Pro)renin receptor is involved in mesangial fibrosis and matrix expansion
Source: PubMed Central journal article supplement (PMC5758707; doi:10.1038/s41598-017-18314-w), 2018-01-08
Supplement: 41598_2017_18314_MOESM1_ESM.pdf [file 41598_2017_18314_MOESM1_ESM.pdf]

1 (Pro)renin receptor is involved in mesangial fibrosis and matrix expansion

2  
3 Kaori Narumi <sup>1</sup>, Emiko Sato <sup>1,2</sup>, Takuo Hirose <sup>1</sup>, Tae Yamamoto <sup>1</sup>, Takashi Nakamichi <sup>1</sup>,  
4 Mariko Miyazaki <sup>1</sup>, Hiroshi Sato <sup>1,2</sup>, Sadayoshi Ito <sup>1</sup>

5  
6 <sup>1</sup>Division of Nephrology, Endocrinology and Vascular Medicine, Tohoku University  
7 Graduate School of Medicine, 1-1 Seiryomachi, Aoba-ku, Sendai 980-8574, Japan.

8 <sup>2</sup>Division of Clinical Pharmacology and Therapeutics, Tohoku University Graduate  
9 School of Pharmaceutical Science, 6-3 Aoba, Aramaki, Aoba-ku, Sendai 980-8579,  
10 Japan.

11  
12 **Running head:** (P)RR in mesangial cells

13  
14 **Correspondence to:** Kaori Narumi

15 Division of Nephrology, Endocrinology, and Vascular Medicine, Tohoku University  
16 Graduate School of Medicine, 1-1 Seiryomachi, Aoba-ku, Sendai 980-8574, Japan.

17 Tel: +81-22-717-7163; Fax: +81-22-717-7168

18 [k-n-0922@med.tohoku.ac.jp](mailto:k-n-0922@med.tohoku.ac.jp)

23 **Supplementary Figure 1**

24

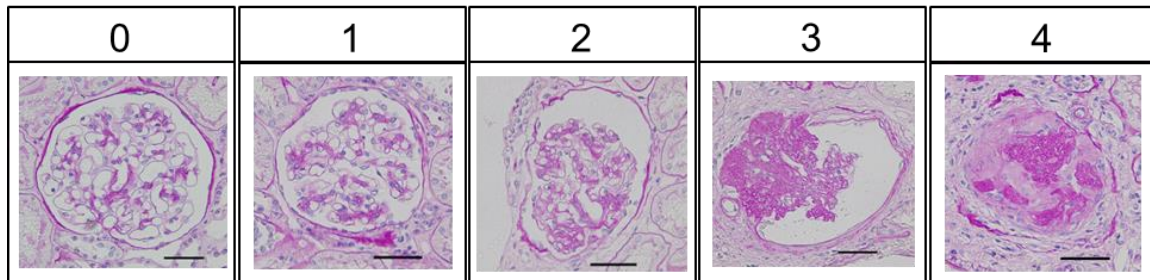

$$\text{IGL} = \frac{(0 \times n_0) + (1 \times n_1) + (2 \times n_2) + (3 \times n_3) + (4 \times n_4)}{n_0 + n_1 + n_2 + n_3 + n_4}$$

25

26

27

28 IGL calculation. Representative glomerulus of each grade with periodic acid-Schiff  
29 staining. The degree of morphological damage in each glomerulus was graded from 0 to  
30 4 according to the percentage of mesangial proliferation and sclerosis. The average of  
31 all glomeruli was calculated as IGL. Scale bars, 50  $\mu\text{m}$ .

32  $n_0$ – $n_4$ , the number of glomeruli showing changes of grade 0 to 4.

33

34

35

## 36 **Supplementary Methods**

37 The renal biopsy specimens were evaluated according to the Oxford Classification of  
38 IgA nephropathy (MEST score)<sup>1</sup> by well-trained nephrologists. The MEST score  
39 includes the following four histological components: mesangial hypercellularity  
40 mesangial score  $\leq 0.5$  (M0),  $> 0.5$ , or  $> 50\%$  of glomeruli with  $\geq 4$  mesangial cells per  
41 mesangial area (M1), endocapillary hypercellularity absent (E0) or present (E1),  
42 segmental glomerulosclerosis absent (S0) or present (S1), tubular atrophy/interstitial  
43 fibrosis  $< 25\%$  (T0), 25–50% (T1),  $> 50\%$  (T2). The index of glomerular lesion (IGL)  
44 as an original index consists of mesangial cells and matrix, and is used for evaluation of  
45 the chronic phase in mesangial proliferative glomerulonephritis <sup>2</sup>; it is converted into  
46 numerical values by the degree of sclerotic changes as previously described (score 0–4;  
47 0: no glomerular change; 1: lesion localized to mesangial area; 2: focal structure  
48 collapse of capillary; 3: remarkable structure collapse of capillary; 4: global sclerosis)  
49 (**Supplementary Fig. 1**)<sup>3-6</sup>. IGL has been reported to be a predictor of renal function  
50 and of the response to treatment in IgA nephropathy patients <sup>4</sup>. The interstitial fibrosis  
51 area was determined with the Verhoeff and Masson trichrome stain.

52

## 53 **Supplementary References**

- 54 1 Working Group of the International Ig, A. N. N. *et al.* The Oxford classification of IgA  
55 nephropathy: rationale, clinicopathological correlations, and classification. *Kidney Int.*  
56 **76**, 534-545 (2009).
- 57 2 Suwa N, T. T. Morphological and Morphometrical Analysis of Circulation in  
58 Hypertension and Ischemic Kidney. *Munchen-Berlin-Wien, Germany, Urban &*  
59 *Schwarzenberg*, pp 108-116 (1971).

60 3 Sato, Y., Hotta, O., Taguma, Y., Takasaka, T. & Nose, M. IgA nephropathy with poorly  
61 developed lymphoepithelial symbiosis of the palatine tonsils. *Nephron*. **74**, 301-308  
62 (1996).

63 4 Hotta, O. *et al.* Predictive value of small crescents in IgA nephropathy: analysis of four  
64 patients showing a deteriorated renal function during a long follow-up period. *Clin*  
65 *Nephrol*. **40**, 125-130 (1993).

66 5 Ootaka, T. *et al.* Histologic localization of terminal complement complexes in renal  
67 diseases. An immunohistochemical study. *Am J Clin Pathol*. **91**, 144-151 (1989).

68 6 Hotta, O. *et al.* Tonsillectomy and steroid pulse therapy significantly impact on clinical  
69 remission in patients with IgA nephropathy. *Am J Kidney Dis*. **38**, 736-743 (2001).

70

71

72 **Supplementary Figure 2**

73 (a)

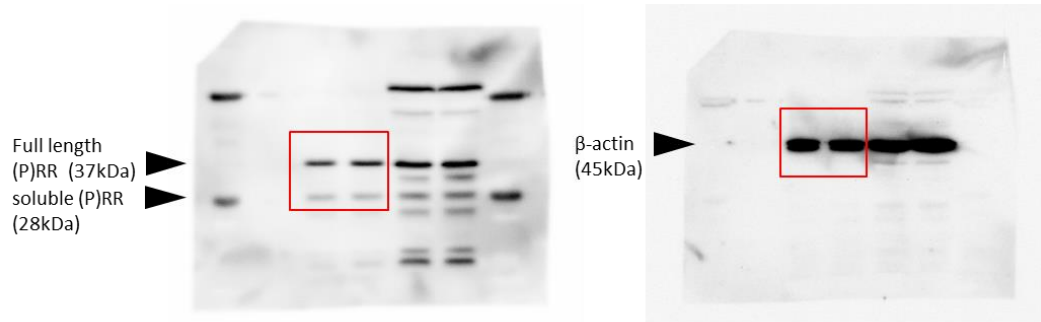

74

75 (b)

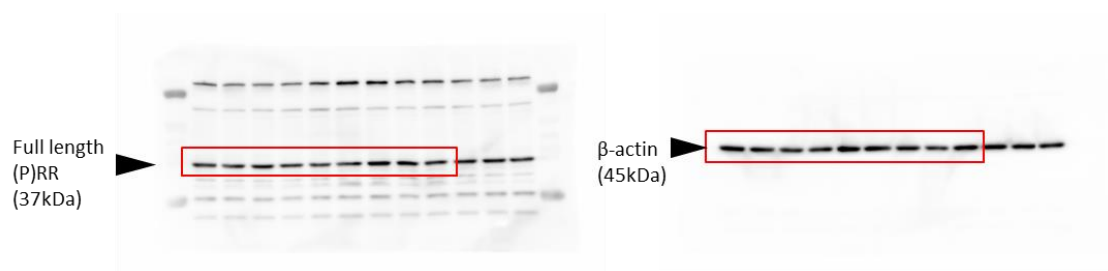

76

77 (c)

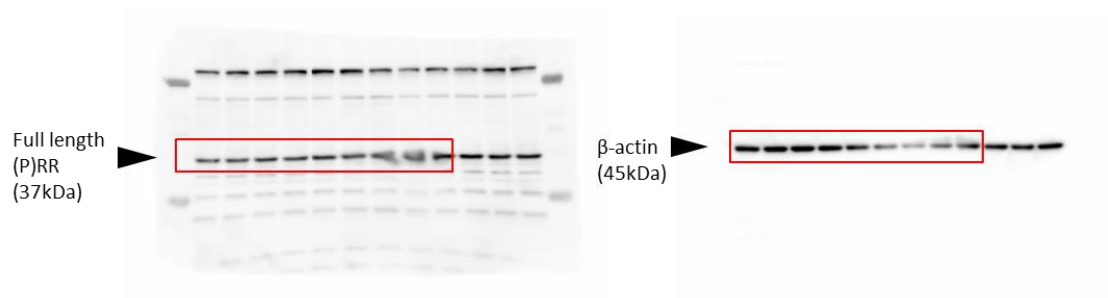

78

79 **Supplementary Figure 2.** (a) (P)RR protein expression in SV40 MES13 cells assessed  
80 by western blot analysis. (b and c) SV40 MES13 cells were incubated with the indicated  
81 concentration of IS for 24 h (b) or 48 h (c). Highlighted lanes of unedited gel  
82 correspond to Figure 2.

83

84 **Supplementary Figure 3**

85 (a)

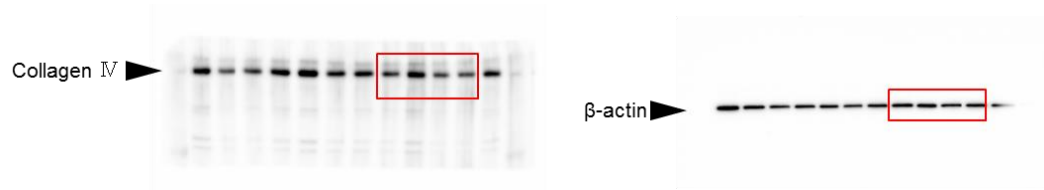

86

87 (b)

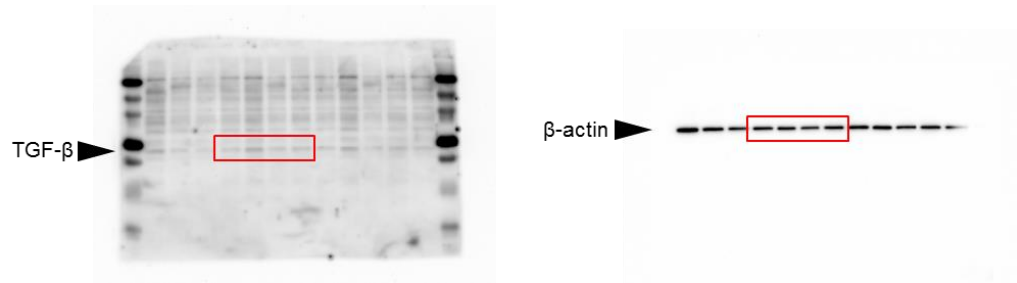

88

89 (c)

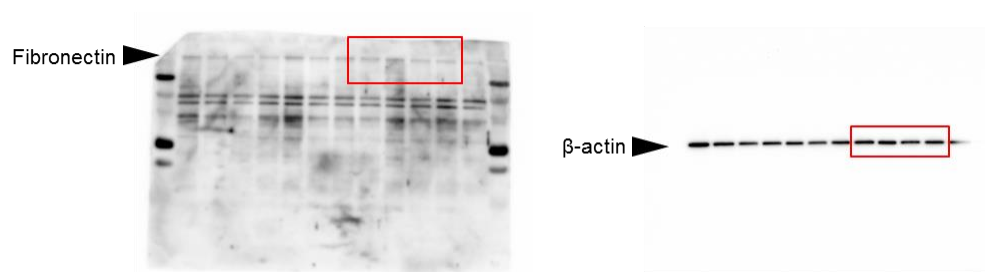

90

91 (d)

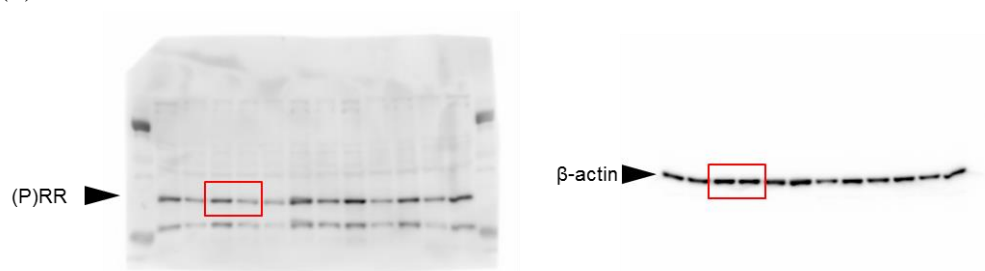

92

93 **Supplementary Figure 3.** (a-c) Immunoblotting of type IV collagen (a), TGF- $\beta$  (b) and

94 fibronectin (c) in SV40 MES13 cells transfected with (P)RR siRNA or scRNA. Cells

95 were stimulated with 250  $\mu$ M IS or 50mM Tris-HCl (ctl) for 48 h. (d) (P)RR expression

96 in SV40 MES13 cells transfected with (P)RR siRNA or scRNA. Highlighted lanes of

97 unedited gel correspond to Figure 4.

98

99

100 **Supplementary Figure 4**

101 (a)

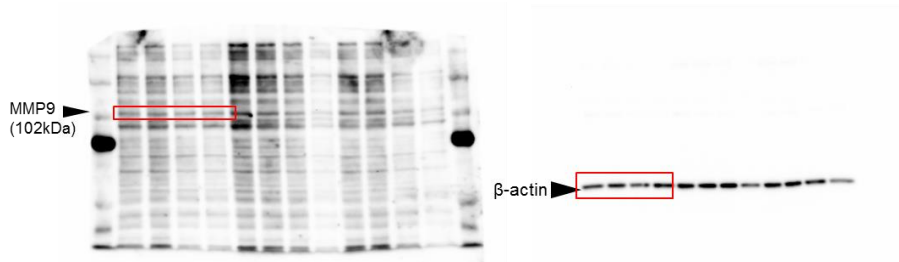

102

103 (b)

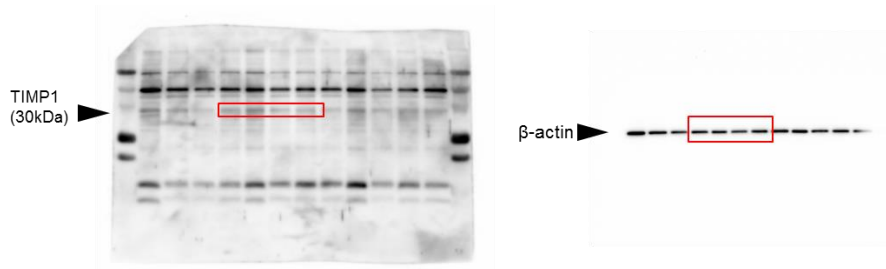

104

105

106 **Supplementary Figure 4.** (a and b) Immunoblotting of MMP9 (a) and TIMP1 (b).  
107 Cells were stimulated with 250  $\mu$ M IS or 50mM Tris-HCl (ctl) for 48 h. Highlighted  
108 lanes of unedited gel correspond to Figure 5.

109

110 **Supplementary Figure 5**

111 (a)

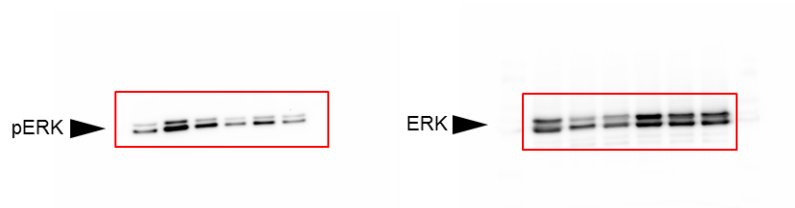

112

113 (b)

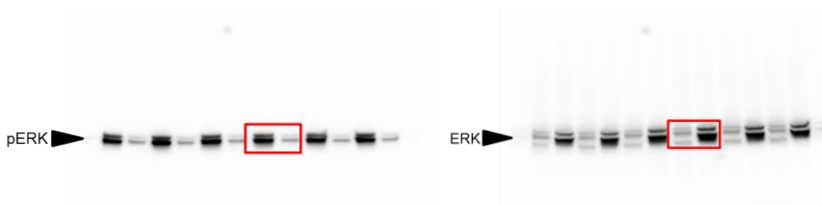

114

115 (c)

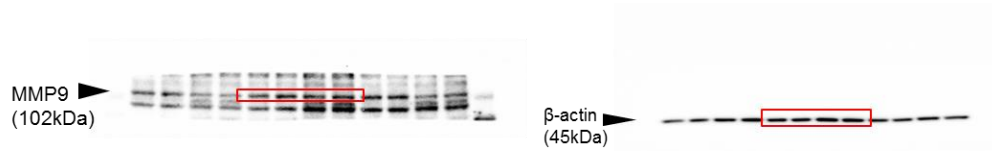

116

117 (d)

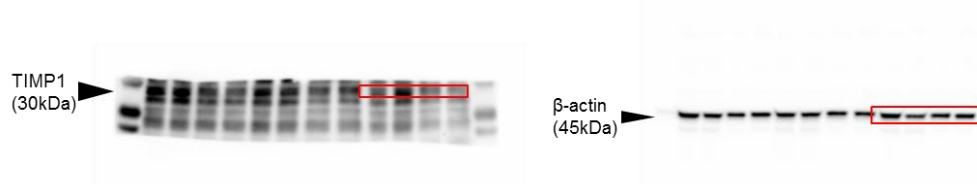

118

119

120 **Supplementary Figure 5.** (a) Immunoblotting of phospho-ERK1/2 (pERK1/2) and  
121 total ERK1/2. Cells were stimulated with 250 μM IS. (b) Immunoblotting of  
122 phospho-ERK1/2 (pERK1/2) and total ERK1/2. Cells were stimulated by 250 μM IS in  
123 the medium with or without U0126 (ERK1/2 specific inhibitor). (c and d)  
124 Immunoblotting of MMP9 (c) and TIMP1 (d). Cells were stimulated with 250 μM IS or  
125 50 mM Tris-HCl (ctl) for 48 h after treatment of U0126. Highlighted lanes of unedited  
126 gel correspond to Figure 6.

127



128 **Supplementary Figure 6**

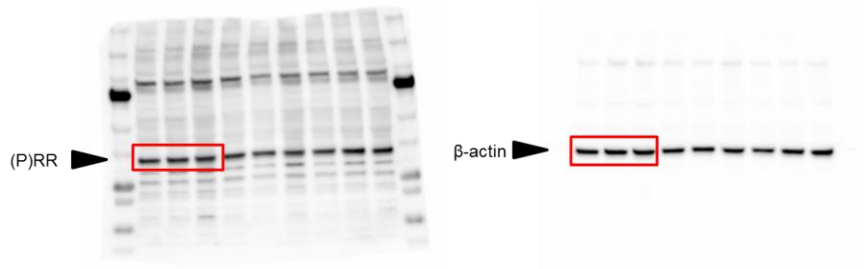

129

130

131 **Supplementary Figure 6.** Immunoblotting of (P)RR. Cells were stimulated with 50

132 mM Tris-HCl or other uremic toxins including methylguanidine and hippuric acid.

133 Highlighted lanes of unedited gel correspond to the result of (P)RR expression to

134 Reviewer 2.

135
